# Supplementary material
Source: bioRxiv or medRxiv preprint supplement (https://www.biorxiv.org/highwire/filestream/141707/field_highwire_adjunct_files/0/472506-1.pdf)
Supplement: Supplementary file [file 472506-1.pdf]

Supplemental Information for  
**Dispersal predicts hybrid zone widths across animal diversity**

**SUPPLEMENTARY TABLES**

**Table S1:** Key metadata collected for each cline included in this study.

| <b>Metadata</b>                  | <b>Details</b>                                                                    | <b>Notes</b>                                                                                                                                                                                    |
|----------------------------------|-----------------------------------------------------------------------------------|-------------------------------------------------------------------------------------------------------------------------------------------------------------------------------------------------|
| <b>type</b>                      | The type of phenotypic or molecular trait for which the cline was estimated       | Summarized as: morphological traits, traits involved in mating (e.g. pheromones or bird song), mtDNA markers, nuclear DNA markers, karyotypic markers, or sex-linked DNA markers (see Fig. S3C) |
| <b>Number of markers</b>         | For molecular clines, the number of loci used to infer the cline                  | Used for hybrid indices based on multiple molecular markers                                                                                                                                     |
| <b>Biallelic or quantitative</b> | Whether the cline-fitting analysis treats characters as biallelic or quantitative | Molecular cline estimates based on more than one locus were coded quantitative; all morphological data were coded quantitative                                                                  |
| <b>Width</b>                     | Point estimate for cline width                                                    |                                                                                                                                                                                                 |
| <b>Center</b>                    | Point estimate for cline center                                                   |                                                                                                                                                                                                 |
| <b>Difference between tails</b>  | The difference in trait values at the extreme tails of each hybridizing species   | For biallelic traits, this reflected differences in allele frequency; for quantitative traits, this reflected standardized differences in phenotypes                                            |
| <b>Program used</b>              | The program used to estimate cline parameters                                     |                                                                                                                                                                                                 |

**Table S2:** Key metadata collected for each hybridizing pair included in this study.

| <b>Metadata</b>            | <b>Details</b>                                                                                                                               | <b>Notes</b>                                                                                                                                                                                  |
|----------------------------|----------------------------------------------------------------------------------------------------------------------------------------------|-----------------------------------------------------------------------------------------------------------------------------------------------------------------------------------------------|
| <b>taxa</b>                | The scientific names of the hybridizing taxa                                                                                                 | Some hybrid zones occur between taxa not currently recognized as species; in these cases, we followed the naming convention used by the study's authors                                       |
| <b>Moving or not?</b>      | Whether or not authors provided or referred to evidence that the hybrid zone is moving in position over time                                 | Many studies did not provide this information                                                                                                                                                 |
| <b>anthropogenic?</b>      | Whether or not the hybrid zone arose due to anthropogenic disturbance and / or is being affected by anthropogenic effects                    | Many studies did not provide this information                                                                                                                                                 |
| <b>Genetic distance</b>    | Estimates of genetic distance (reported in units of substitution) between the taxa                                                           | We calculated most estimates using GenBank data. Other estimates were taken from the literature. For all estimates, we noted the marker and model of molecular evolution used.                |
| <b>Dispersal estimate</b>  | Estimates of dispersal, and their units, for the taxa or closely-related taxa                                                                |                                                                                                                                                                                               |
| <b>Dispersal type</b>      | The methodology used to estimate dispersal                                                                                                   | Many ecological and genetic approaches were used to estimate dispersal, including mark-recapture studies and approaches based on linkage disequilibrium and patterns of isolation-by-distance |
| <b>Generation time</b>     | Estimated generation time for the taxa                                                                                                       |                                                                                                                                                                                               |
| <b>Taxonomic group</b>     | Broadly categorized into: amphibian, bird, fish, insect, mammal, non-avian reptile (NAR), and other invertebrates                            |                                                                                                                                                                                               |
| <b>Geographic location</b> | Broadly categorized into: Africa, Asia, Australia / New Zealand, Central America, Eurasia, Europe, Middle East, North America, South America |                                                                                                                                                                                               |
| <b>citation</b>            | All papers used to summarize evidence from the hybrid zone and the hybridizing pair                                                          |                                                                                                                                                                                               |

**Table S3:** Hybrid zones for which geographic clines were estimated in the literature but were not included in our global analysis because of missing data. Several iconic hybrid zones are neither listed here nor included in our final dataset because geographic clines were not measured. Some bird hybrid zones where dispersal data were lacking were included in bird-only analyses where a morphological proxy (hand-wing index) for dispersal was used as a predictor of cline width instead.

| <b>Taxon 1</b>                                    | <b>Taxon 2</b>                                        | <b>reason excluded</b>                               | <b>representative citation</b>                                             |
|---------------------------------------------------|-------------------------------------------------------|------------------------------------------------------|----------------------------------------------------------------------------|
| <i>Albinaria hippolyti</i> , lineage 1            | <i>Albinaria hippolyti</i> , lineage 2                | no mtDNA data                                        | Schilthuizen and Lombaerts (1995) <i>Biol J of Linn Soc</i> 54: 111 - 138. |
| <i>Allonemobius fasciatus</i>                     | <i>Allonemobius socius</i>                            | cline widths not reported as point estimates         | Howard (1986) <i>Evolution</i> 40: 34 - 43.                                |
| <i>Aponomma hydrosauri</i>                        | <i>Aponomma libatum</i>                               | cline widths not reported as point estimates         | Bull and Burzacott (2001) <i>Mol Ecol</i> 10: 639 - 49.                    |
| <i>Barytettix humphreysii</i>                     | <i>Barytettix humphreysii</i>                         | cline data not given in terms of geographic distance | Knowles <i>et al.</i> (2016) <i>J Orthoptera Research</i> 25: 75 - 82.     |
| <i>Caledia captiva</i> "Moreton" lineage          | <i>Caledia captiva</i> "Torresian" lineage            | no mtDNA data                                        | Shaw and Wilkinson (1980) <i>Chromosoma</i> 80: 1 - 31.                    |
| <i>Chorthippus albomarginatus</i>                 | <i>Chorthippus oschei</i>                             | cline data not formalized                            | Vedenina (2011) <i>Biol J of Linn Soc</i> 102: 275 - 291.                  |
| <i>Cottus gobio</i> E lineage                     | <i>Cottus gobio</i> W lineage                         | cline widths not reported as point estimates         | Kontula and Vainola (2004) <i>Biol J of Linn Soc</i> 81: 535-552.          |
| <i>Eopsaltria australis</i> North                 | <i>Eopsaltria australis</i> South                     | mtDNA data cannot be assigned to taxa                | Morales <i>et al.</i> (2017) <i>J Biogeography</i> 44: 522 - 536.          |
| <i>Gasterosteus aculeatus</i> , marine population | <i>Gasterosteus aculeatus</i> , freshwater population | no mtDNA data                                        | Pederson <i>et al.</i> (2017) <i>BMC Evol Bio</i> 17: 130.                 |
| <i>Gasterosteus aculeatus</i> , stream population | <i>Gasterosteus aculeatus</i> , anadromous population | no mtDNA data                                        | Vines <i>et al.</i> (2016) <i>Evolution</i> 70: 1023 - 1038.               |
| <i>Geomys breviceps</i>                           | <i>Geomys bursarius</i>                               | cline widths not reported as point estimates         | Cothran and Zimmerman (1985) <i>J Mammology</i> 66: 489 - 497.             |
| <i>Jacana spinosa</i>                             | <i>Jacana jacana</i>                                  | no dispersal data                                    | Miller <i>et al.</i> (2014) <i>BMC Evol Bio</i> 14: 227.                   |
| <i>Manacus vitellinus</i>                         | <i>Manacus candei</i>                                 | no dispersal data                                    | Brumfield <i>et al.</i> (2001) <i>Evolution</i> 55: 2070 - 2087.           |
| <i>Nectarinia moreaui</i>                         | <i>Nectarinia fueelleborni</i>                        | no dispersal data                                    | McEntee <i>et al.</i> (2016) <i>Evolution</i> 70: 1307 - 1321.             |
| <i>Paratyta australiensis</i> , Kilcoy Ck         | <i>Paratyta australiensis</i> , Branch Ck             | cline widths not reported                            | Wilson, Schmidt and Hughes (2016) <i>J Heredity</i> 107: 413 - 422.        |
| <i>Patella ulyssiponensis</i>                     | <i>Patella rustica</i>                                | cline center reported only                           | Sa-Pinto <i>et al</i> (2012) <i>PLOS One</i> 7: e50330.                    |
| <i>Plethodon jordani</i>                          | <i>Plethodon glutinosus</i>                           | cline data not formalized                            | Hairston <i>et al.</i> (1992) <i>Evolution</i> 46:930 - 938.               |
| <i>Poephila acuticauda</i> , yellow-beaked        | <i>Poephila acuticauda</i> , red-beaked               | mtDNA data from GenBank cannot be assigned to taxa   | Griffith and Hooper (2016) <i>Emu</i> 2: 141 - 150.                        |
| <i>Quiscalus quiscula versicolor</i>              | <i>Quiscalus quiscula quiscula</i>                    | no formal cline analysis                             | Yang and Selander (1968) <i>Systematic Biology</i> 17: 107 - 143.          |
| <i>Ranitomeya imitator</i> banded                 | <i>Ranitomeya imitator</i> striped                    | no mtDNA data                                        | Twomey <i>et al.</i> (2015) <i>Am Nat</i> 187: 205 - 224.                  |
| <i>Ranitomeya imitator</i> spotted                | <i>Ranitomeya imitator</i> striped                    | no mtDNA data                                        | Twomey <i>et al.</i> (2015) <i>Am Nat</i> 187: 205 - 224.                  |
| <i>Ranitomeya imitator</i> striped                | <i>Ranitomeya imitator</i> vardero                    | no mtDNA data                                        | Twomey <i>et al.</i> (2015) <i>Am Nat</i> 187: 205 - 224.                  |
| <i>Sorex araneus</i> - Novosibirsk                | <i>Sorex araneus</i> - Tomsk                          | no mtDNA data                                        | Polyakov <i>et al.</i> (2011) <i>J Evol Bio</i> 24: 1393 - 1402.           |
| <i>Xiphophorus birchmanni</i>                     | <i>Xiphophorus malinche</i>                           | cline widths not reported as point estimates         | Culumber <i>et al.</i> (2011) <i>Mol Ecol</i> 20: 342 - 356.               |
| <i>Zosterops borbonicus</i> , grey-headed         | <i>Zosterops borbonicus</i> , brown-naped             | no mtDNA data                                        | Delahie <i>et al.</i> (2017) <i>J Evol Bio</i> 30: 2132 - 2145.            |
| <i>Zosterops pallidus</i>                         | <i>Zosterops virens capensis</i>                      | no dispersal data                                    | Oatley <i>et al.</i> (2017) <i>Biol J Linn Soc</i> 121: 670 - 684.         |

**Table S4:** Model fitting for data set filtered to include clines from terrestrial systems only ( $N = 1424$  clines across 122 hybrid zones). Models predicting the log of cline width were fit using a linear mixed model. Predictors were the log of mtDNA distance and log of dispersal. Random effects were cline type (see Fig. S2C) and a series of nested random effects: transect, nested within taxon pair, nested within larger taxonomic group (see Fig. S1C). Shown are AICc and  $\Delta$ AICc scores.  $R^2$ GLMM( $m$ ) shows the estimated proportion of variance explained by the fixed effects;  $R^2$ GLMM( $c$ ) for both fixed and random effects. The best model is shown in bold.

| model                                                            | df       | LnL          | AICc        | $\Delta$ AICc | $R^2$ GLMM( $m$ ) | $R^2$ GLMM( $c$ ) |
|------------------------------------------------------------------|----------|--------------|-------------|---------------|-------------------|-------------------|
| $\sim \log(\text{mtDNA distance}) \times \log(\text{dispersal})$ | 9        | -2407.1      | 4832.3      | 2.3           | 0.157             | 0.723             |
| $\sim \log(\text{mtDNA distance}) + \log(\text{dispersal})$      | 8        | -2408.3      | 4832.7      | 2.7           | 0.165             | 0.728             |
| $\sim \log(\text{mtDNA distance})$                               | 7        | -2418.6      | 4851.4      | 21.3          | 0.007             | 0.759             |
| <b><math>\sim \log(\text{dispersal})</math></b>                  | <b>7</b> | <b>-2408</b> | <b>4830</b> | <b>-</b>      | <b>0.165</b>      | <b>0.73</b>       |
| $\sim 1$                                                         | 6        | -2418.5      | 4849        | 19            | 0                 | 0.775             |

**Table S5:** Model averaging results for terrestrial models (shown in Table S4), including coefficients and relative importance.

| predictor                                                   | coefficient | standard error | relative importance |
|-------------------------------------------------------------|-------------|----------------|---------------------|
| $\log(\text{dispersal})$                                    | 0.897       | 0.158          | 1                   |
| $\log(\text{mtDNA distance})$                               | -0.067      | 0.125          | 0.37                |
| $\log(\text{mtDNA distance}) \times \log(\text{dispersal})$ | 0.057       | 0.126          | 0.204               |

**Table S6:** Model fitting for full data set ( $N = 1,488$  clines across 131 hybrid zones) in which taxonomic group was included as a fixed effect rather than a random effect. Models predicting the log of cline width were fit using a linear mixed model. Predictors were the log of mtDNA distance, log of dispersal, and taxonomic group. Random effects were cline type (see Fig. S2C) and transect nested within taxon pair. Shown are AICc and  $\Delta$ AICc scores.  $R^2$ GLMM( $m$ ) shows the estimated proportion of variance explained by the fixed effects;  $R^2$ GLMM( $c$ ) for both fixed and random effects. The top five models are shown as determined by AICc scores; the best model is shown in bold.

| model                                                                                                                   | df        | LnL          | AICc          | $\Delta$ AICc | $R^2$ GLMM( $m$ ) | $R^2$ GLMM( $c$ ) |
|-------------------------------------------------------------------------------------------------------------------------|-----------|--------------|---------------|---------------|-------------------|-------------------|
| <b><math>\sim \log(\text{dispersal}) \times \text{taxonomic group}</math></b>                                           | <b>18</b> | <b>-2497</b> | <b>5031.4</b> | <b>-</b>      | <b>0.231</b>      | <b>0.75</b>       |
| $\sim \log(\text{dispersal}) \times \log(\text{mtDNA distance}) + \log(\text{dispersal}) \times \text{taxonomic group}$ | 20        | -2499        | 5038.7        | 7.266         | 0.233             | 0.753             |
| $\sim \log(\text{dispersal})$                                                                                           | 6         | -2517        | 5046.4        | 14.96         | 0.172             | 0.755             |
| $\sim \log(\text{dispersal}) + \text{taxonomic group}$                                                                  | 12        | -2511        | 5046.7        | 15.305        | 0.182             | 0.755             |
| $\sim \log(\text{dispersal}) + \log(\text{mtDNA distance})$                                                             | 7         | -2517        | 5049.8        | 18.408        | 0.165             | 0.754             |

**Table S7:** Model averaging results for models in which phylogenetic group was included as a fixed effect (shown in Table S6), including coefficients and relative importance. Coefficients not reported for predictors including taxonomic group because these are calculated for each of the seven taxonomic groups.

| predictor                            | coefficient | standard error | relative importance |
|--------------------------------------|-------------|----------------|---------------------|
| log(dispersal)                       | 0.227       | 0.499          | 1                   |
| log(mtDNA distance)                  | -0.001      | 0.026          | 0.026               |
| taxonomic group                      | NA          | NA             | 1                   |
| log(mtDNA distance) × log(dispersal) | 0.003       | 0.03           | 0.026               |
| taxonomic group × log(dispersal)     | NA          | NA             | 1                   |

**Table S8:** Model fitting for data set filtered to include only mitochondrial DNA clines ( $N = 91$  clines across 74 hybrid zones). Models predicting the log of cline width were fit using a linear mixed model. Predictors were the log of mtDNA distance and log of dispersal. The sole random effect was a series of nested random effects: transect, nested within taxon pair, nested within taxonomic group (see Fig. S1C). Shown are AICc and  $\Delta$ AICc scores.  $R^2$ GLMM( $m$ ) shows the estimated proportion of variance explained by the fixed effects;  $R^2$ GLMM( $c$ ) for both fixed and random effects. The best model is shown in bold.

| model                                  | df       | LnL           | AICc         | $\Delta$ AICc | $R^2$ GLMM( $m$ ) | $R^2$ GLMM( $c$ ) |
|----------------------------------------|----------|---------------|--------------|---------------|-------------------|-------------------|
| ~ log(mtDNA distance) × log(dispersal) | 6        | -177.9        | 368.8        | 5.6           | 0.34              | 0.367             |
| ~ log(mtDNA distance) + log(dispersal) | 5        | -178          | 366.8        | 3.5           | 0.331             | 0.356             |
| ~ log(mtDNA distance)                  | 4        | -190          | 388.5        | 25.2          | 0.001             | 0.197             |
| <b>~ log(dispersal)</b>                | <b>4</b> | <b>-177.4</b> | <b>363.3</b> | <b>-</b>      | <b>0.325</b>      | <b>0.355</b>      |
| ~ 1                                    | 3        | -189.4        | 385          | 21.7          | 0                 | 0.204             |

**Table S9:** Model averaging results for the data set that only includes mtDNA clines (models shown in Table S8), including coefficients and relative importance.

| predictor                            | coefficient | standard error | relative importance |
|--------------------------------------|-------------|----------------|---------------------|
| log(dispersal)                       | 1.13        | 0.20           | 1                   |
| log(mtDNA distance)                  | -0.02       | 0.09           | 0.19                |
| log(mtDNA distance) × log(dispersal) | 0.01        | 0.07           | 0.05                |

**Table S10:** Model fitting for data set filtered to only include taxon pairs for which mtDNA distance was estimated using the most common gene, *cytochrome b* ( $N = 259$  clines across 41 hybrid zones). Models predicting the log of cline width were fit using a linear mixed model. Predictors were the log of mtDNA distance and log of dispersal. Random effects were cline type (see Fig. S2C) and a series of nested random effects: transect, nested within taxon pair, nested within larger taxonomic group (see Fig. S1C). Shown are AICc and  $\Delta$ AICc scores.  $R^2$ GLMM( $m$ ) shows the estimated proportion of variance explained by the fixed effects;  $R^2$ GLMM( $c$ ) for both fixed and random effects. The best model is shown in bold.

| model                                                            | df       | LnL           | AICc         | $\Delta$ AICc | $R^2$ GLMM( $m$ ) | $R^2$ GLMM( $c$ ) |
|------------------------------------------------------------------|----------|---------------|--------------|---------------|-------------------|-------------------|
| $\sim \log(\text{mtDNA distance}) \times \log(\text{dispersal})$ | 9        | -452          | 922.7        | 3.8           | 0.08              | 0.643             |
| $\sim \log(\text{mtDNA distance}) + \log(\text{dispersal})$      | 8        | -452.2        | 921          | 2.1           | 0.08              | 0.641             |
| $\sim \log(\text{mtDNA distance})$                               | 7        | -453.6        | 921.6        | 2.8           | 0.036             | 0.646             |
| <b><math>\sim \log(\text{dispersal})</math></b>                  | <b>7</b> | <b>-452.2</b> | <b>918.9</b> | <b>-</b>      | <b>0.069</b>      | <b>0.632</b>      |
| $\sim 1$                                                         | 6        | -454          | 920.3        | 1.49          | 0                 | 0.638             |

**Table S11:** Model averaging results for the dataset limited to those where *cytochrome b* was used to estimate mtDNA distance (shown in Table S10), including coefficients and relative importance.

| predictor                                                   | coefficient | standard error | relative importance |
|-------------------------------------------------------------|-------------|----------------|---------------------|
| $\log(\text{dispersal})$                                    | 0.49        | 0.45           | 0.67                |
| $\log(\text{mtDNA distance})$                               | -0.08       | 0.19           | 0.33                |
| $\log(\text{mtDNA distance}) \times \log(\text{dispersal})$ | 0.02        | 0.11           | 0.07                |

**Table S12:** Model fitting for data set filtered to only include avian hybridizing pairs ( $N = 37$  hybrid zones). Models predicting the log of the geometric mean of cline width were fit using a linear model. Predictors were the log of mtDNA distance and hand-wing index (HWI), a proxy for dispersal. Shown are adjusted  $r^2$ , AICc, and relative likelihood. The best model is bolded.

| formula                                                    | df          | AICc         | adj. $r^2$   | rel. likelihood |
|------------------------------------------------------------|-------------|--------------|--------------|-----------------|
| $\sim \log(\text{mtDNA distance}) \times \log(\text{HWI})$ | 4,33        | 128          | 0.061        | 0.192           |
| $\sim \log(\text{mtDNA distance}) + \log(\text{HWI})$      | 3,34        | 125.4        | 0.089        | 0.705           |
| <b><math>\sim \log(\text{HWI})</math></b>                  | <b>2,35</b> | <b>124.7</b> | <b>0.068</b> | <b>1</b>        |
| $\sim \log(\text{mtDNA distance})$                         | 2,35        | 127          | 0.01         | 0.317           |
| $\sim 1$                                                   | 1,36        | 126          | 0            | 0.522           |

**Table S13:** Model averaging results for the dataset limited to avian hybridizing pairs, using hand-wing index (HWI) to measure dispersal (shown in Table S12), including coefficients and relative importance.

| predictor                                             | coefficient | standard error | relative importance |
|-------------------------------------------------------|-------------|----------------|---------------------|
| $\log(\text{HWI})$                                    | 0.21        | 0.20           | 0.69                |
| $\log(\text{mtDNA distance})$                         | 0.10        | 0.16           | 0.45                |
| $\log(\text{mtDNA distance}) \times \log(\text{HWI})$ | 0.00        | 0.04           | 0.06                |

**Table S14:** Model fitting for data set filtered to only include avian hybridizing pairs ( $N = 16$  hybrid zones; the outlier *Sula* boobies was removed). Models predicting the log of the geometric mean of cline width were fit using a linear model. Predictors were the log of phylogenetic divergence time and log of dispersal. Shown are adjusted  $r^2$ , AICc, and relative likelihood. The best model is bolded.

| formula                                                           | df          | AICc        | adj. $r^2$   | rel. likelihood |
|-------------------------------------------------------------------|-------------|-------------|--------------|-----------------|
| $\sim \log(\text{divergence time}) \times \log(\text{dispersal})$ | 4,13        | 54.4        | 0.277        | 0.449           |
| $\sim \log(\text{divergence time}) + \log(\text{dispersal})$      | 3,14        | 56.6        | 0.027        | 0.15            |
| <b><math>\sim \log(\text{dispersal})</math></b>                   | <b>2,15</b> | <b>53.1</b> | <b>0.091</b> | <b>0.861</b>    |
| $\sim \log(\text{divergence time})$                               | 2,15        | 55.4        | -0.044       | 0.273           |
| $\sim 1$                                                          | 1,16        | 52.8        | 0            | 1               |

**Table S15:** Model averaging results for the dataset limited to avian hybridizing pairs, using phylogenetic divergence time as a proxy for selection against hybrids (shown in Table S14), including coefficients and relative importance.

| predictor                                                    | coefficient | standard error | relative importance |
|--------------------------------------------------------------|-------------|----------------|---------------------|
| $\log(\text{dispersal})$                                     | 0.25        | 0.34           | 0.54                |
| $\log(\text{divergence time})$                               | -0.12       | 0.31           | 0.32                |
| $\log(\text{divergence time}) \times \log(\text{dispersal})$ | 0.10        | 0.25           | 0.17                |

**SUPPLEMENTARY FIGURES**

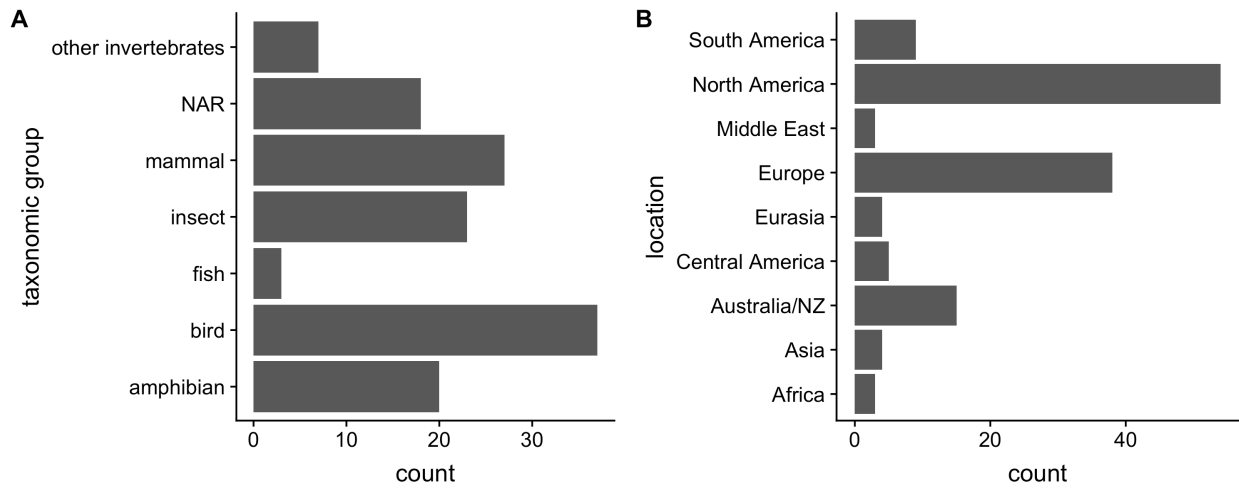

**Figure S1:** The (A) taxonomic and (B) geographic breadth of hybrid zones ( $n=135$ ) included across all analyses. Hybrid zones are found in a diversity of taxa and regions, though there is a bias towards systems involving tetrapods and occurring in the temperate Northern Hemisphere.

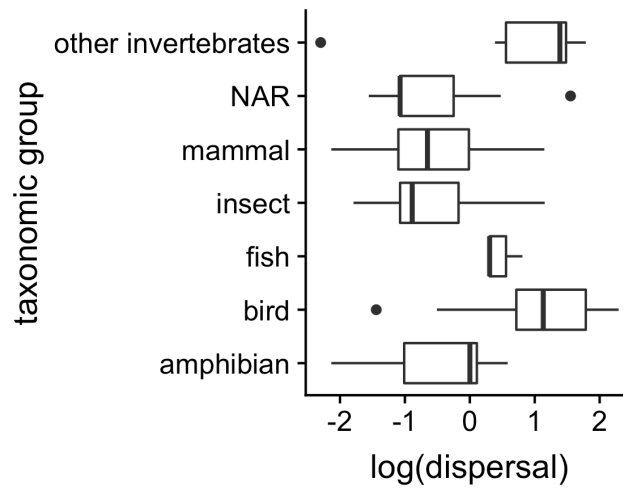

**Figure S2:** Dispersal length estimates across taxonomic groups ( $n=131$ ). Dispersal varies more than four orders of magnitude. Taxonomic group is a significant predictor of variation in dispersal length ( $F_{6, 124} = 17.1$ ;  $p\text{-val} < 2.5e-14$ ;  $\text{adj. } r^2 = 0.43$ )



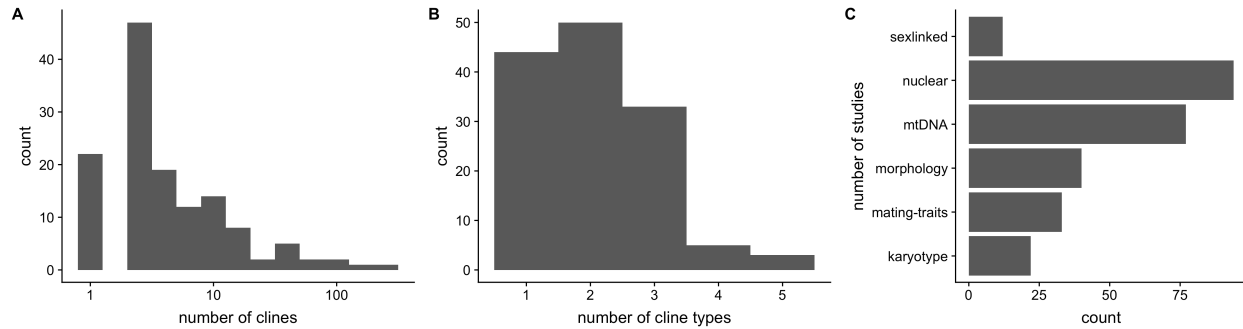

**Figure S3:** Clines collected across hybrid zones. (A) The number of clines estimated per hybrid zone. A median of three clines was estimated per hybrid zone. (B) The number of different cline types estimated per hybrid zone. An average of 2.1 types of clines were estimated per hybrid zone. (C) The number of hybrid zone studies that estimated each type of cline (sex-linked genetic markers, nuclear genetic markers, mtDNA genetic markers, morphological measures, mating-related traits, and karyotypes).

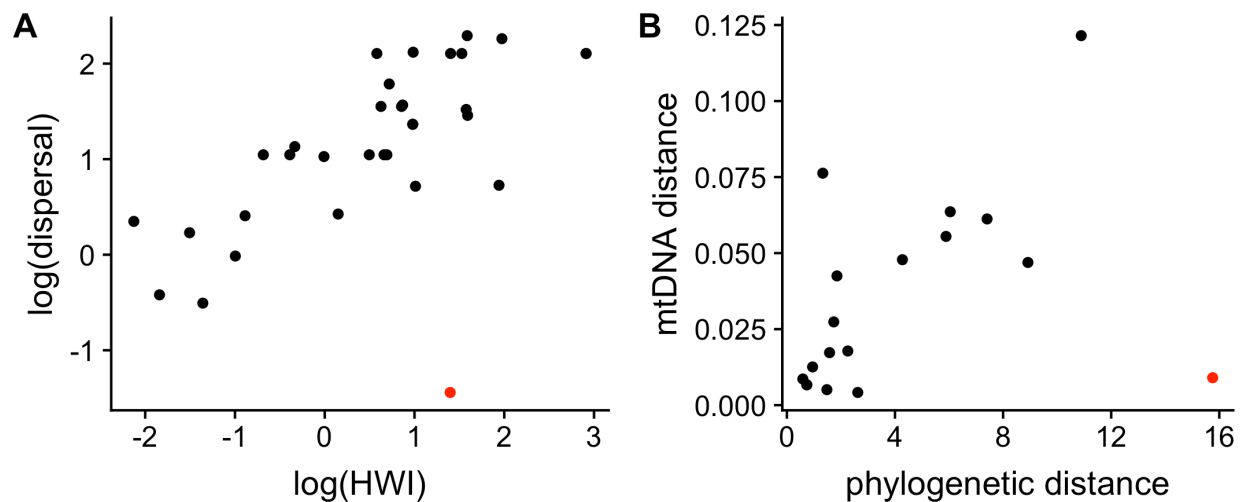

**Figure S4:** Correlations between dispersal and divergence estimates taken from the literature and alternative metrics, for bird hybrid zones only. (A) Correlation between our literature-based estimates of dispersal rate and a common morphological proxy for dispersal capacity, hand-wing index (HWI), with both on the natural log scale. Pearson's  $r = 0.61$  ( $p = 7.2 \times 10^{-8}$ ;  $n = 32$ ). The taxon pair *Sula neboxii* & *S. variegata* is an outlier (shown in red). Excluding this pair returns a Pearson's  $r = 0.80$  ( $p = 7.2 \times 10^{-8}$ ;  $n = 31$ ). Log HWI also predicts log dispersal when phylogeny is taken into account using phylogenetic generalized linear modeling, with Ornstein-Uhlenbeck (OU) errors (slope =  $0.44 \pm 0.14SE$ ,  $t = 3.14$ ,  $p = .0047$ ; p-value is conditional on OU  $\alpha = 0.40$ ; calculated using function `phylolm` with option `OUrandomRoot`). (B) Correlation between mtDNA distance and phylogenetic distance between hybridizing pairs based on a global phylogeny of birds (Burleigh *et al.* 2015). Pearson's  $r = 0.42$  ( $p = 0.08$ ;  $n = 18$ ). The taxon pair *Baeolophus atricristatus* & *B. bicolor* is an outlier (shown in red). Excluding this pair returns a Pearson's  $r = 0.78$  ( $p = .0002$ ;  $n = 17$ ). These results suggest our estimates of dispersal rate and divergence are robust to the use of alternate predictors as proxies for hybrid zone dispersal and selection against hybrids. However, the mtDNA data used to estimate divergence in our study and the data used in the global phylogeny overlap, so a correlation would be expected.

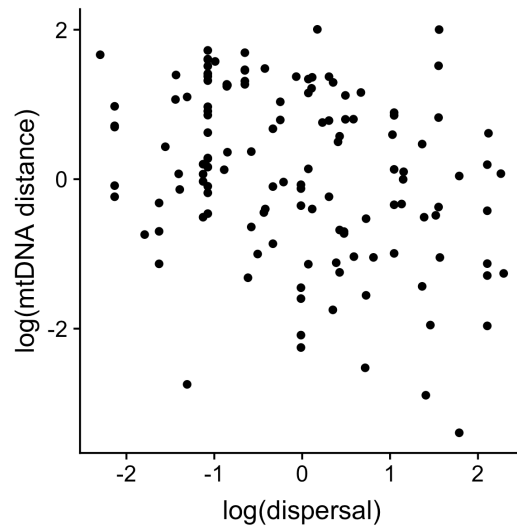

**Figure S5:** Dispersal length and mtDNA distance are weakly but significantly negatively correlated; Pearson's  $r = -0.31$  ( $p\text{-val} = 3.1\text{e-}4$ ,  $n = 131$ ). This suggests that taxa with greater dispersal lengths either accumulate mtDNA divergence more slowly (indicative of divergence with gene flow) and / or come into secondary contact more quickly following initial divergence.

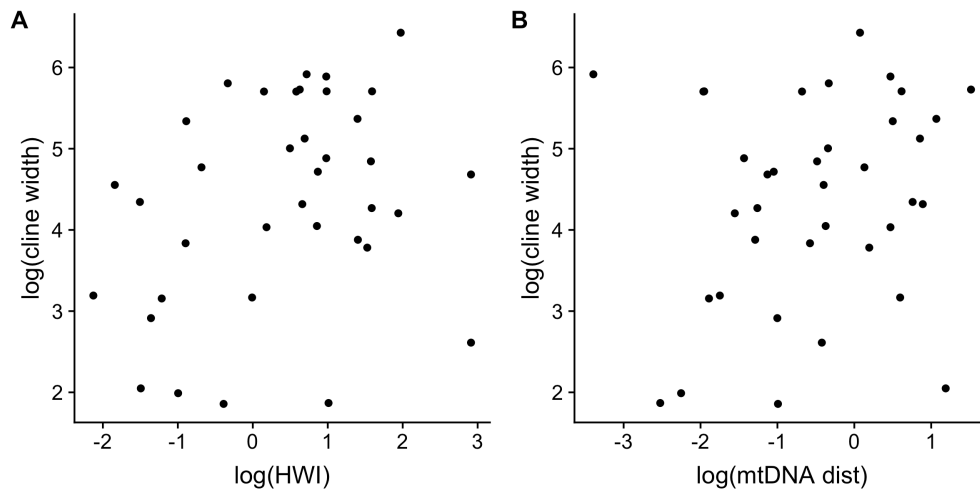

**Figure S6:** Scatterplots of the log of hybrid zone width (calculated as the geometric mean of all cline widths for a hybridizing pair) against (A) the log of the hand-wing index (HWI), and (B) the log of mtDNA distance, for the dataset including all bird hybrid zones for which hand-wing indices were estimated ( $n = 37$  hybridizing pairs).

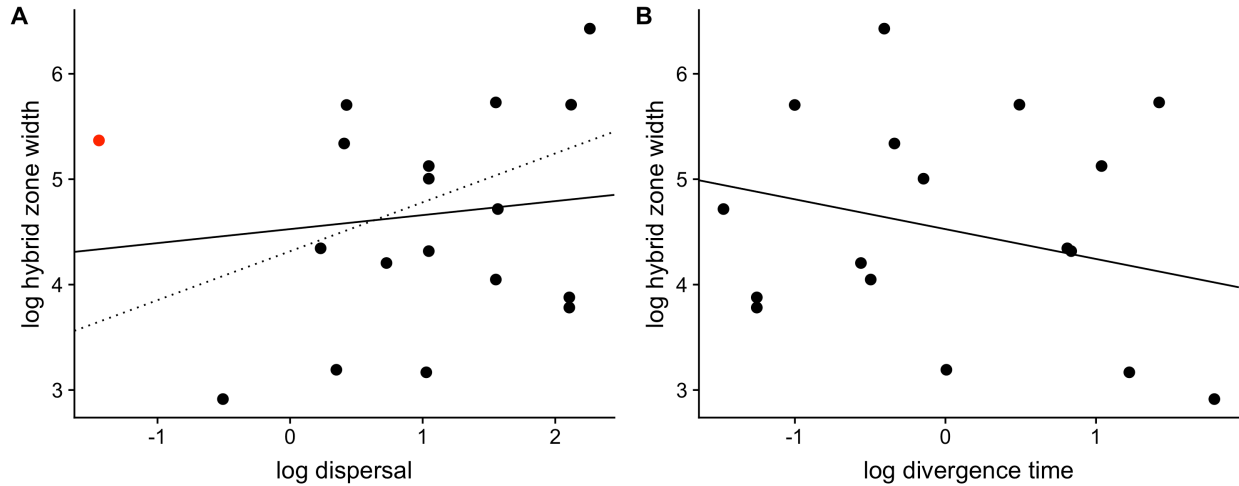

**Figure S7:** Scatterplots of the log of hybrid zone width (calculated as the geometric mean of all cline widths for a hybridizing pair) against (A) the log of dispersal, and (B) the log of divergence time for hybridizing species pairs from a phylogenetic analysis across bird diversity. Plotted lines in (A) are predictions from linear models, obtained via model averaging. The solid line results from modeling all data; the dotted line results after omitting the outlier shown in red (*Sula* boobies).

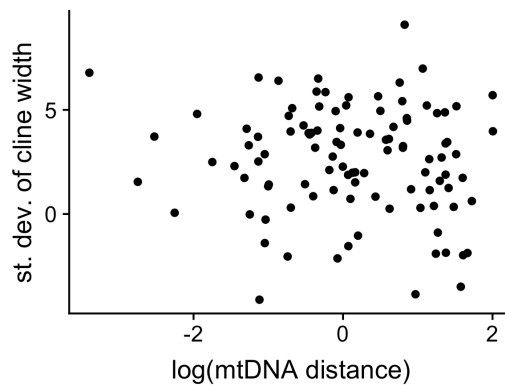

**Figure 8:** A test of the theoretical prediction that standard deviation of cline widths within a hybrid zone should decrease as selection strength between hybridizing pairs increases. As above, we used mtDNA divergence between taxon pairs as a proxy for selection strength. We did not recover the expected correlation  $r = -0.099$  (p-val = 0.32,  $n = 104$ ).
